# Supplementary material for: Effects of Lactate Transport Inhibition by AZD3965 in Muscle-Invasive Urothelial Bladder Cancer
Source: MDPI journal article supplement (doi:10.3390/pharmaceutics15122688), 2023-11-28
Supplement: s1 [file s1]

**Table S1.** List of antibodies used in Western Blot, immunofluorescence and immunohistochemistry

|                             | Antibody         | Company                    | Reference | Dilution |
|-----------------------------|------------------|----------------------------|-----------|----------|
| <b>Western Blot</b>         |                  |                            |           |          |
| <b>Primary antibodies</b>   | MCT1             | Santa Cruz Biotechnology®  | sc-365501 | 1:500    |
|                             | MCT4             | Santa Cruz Biotechnology®  | sc-50329  | 1:500    |
|                             | CD147            | Santa Cruz Biotechnology®  | sc-46700  | 1:500    |
|                             | LDHA             | Santa Cruz Biotechnology®  | sc-100775 | 1:1000   |
|                             | HK2              | AbCam                      | ab104836  | 1:2000   |
|                             | PFKL             | AbCam                      | ab37583   | 1:100    |
|                             | CAIX             | AbCam                      | ab15086   | 1:2000   |
|                             | Caspase 9        | Cell Signaling® Technology | #9502     | 1:1000   |
|                             | p53              | Cell Signaling® Technology | #2527     | 1:1000   |
|                             | Bcl-xL           | Santa Cruz Biotechnology®  | sc-8392   | 1:300    |
|                             | PARP             | Cell Signaling® Technology | #9542     | 1:500    |
| <b>Secondary antibodies</b> | m-IgGκ BP-HRP    | Santa Cruz Biotechnology®  | sc-516102 | 1:1000   |
|                             | IgG-HRP          | Santa Cruz Biotechnology®  | sc-2357   | 1:1000   |
| <b>Loading controls</b>     | β-actin          | Santa Cruz Biotechnology®  | sc-8432   | 1:500    |
|                             | β-Tubulin        | AbCam                      | ab15246   | 1:2500   |
|                             | GAPDH            | Santa Cruz Biotechnology®  | 1:1000    | 1:1000   |
| <b>Immunofluorescence</b>   |                  |                            |           |          |
| <b>Primary antibodies</b>   | MCT1             | AbCam                      | ab35944   | 1:100    |
|                             | MCT4             | Chemicon®, Sigma-Aldrich®  | AB3316P   | 1:100    |
|                             | CD147            | Santa Cruz Biotechnology®  | sc71038   | 1:500    |
| <b>Secondary antibodies</b> | Alexa Fluor® 488 | Invitrogen™                | A11008    | 1:500    |
|                             | Alexa Fluor® 594 | Invitrogen™                | A11032    | 1:500    |
| <b>Immunohistochemistry</b> |                  |                            |           |          |
| <b>Primary antibodies</b>   | Ki-67            | AbCam                      | ab16667   | 1:250    |
|                             | Lectin           | Vector Laboratories        | B1305     | 1:100    |

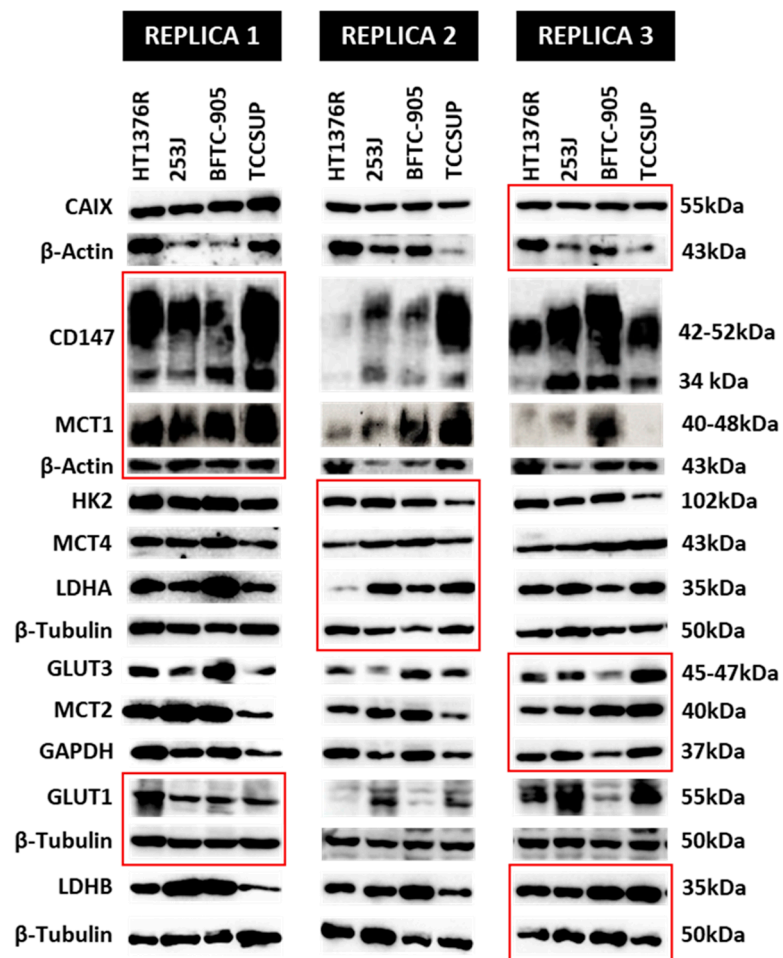

**Figure S1.** Replicate blots for quantification of the Western blot shown in Figure 1A.

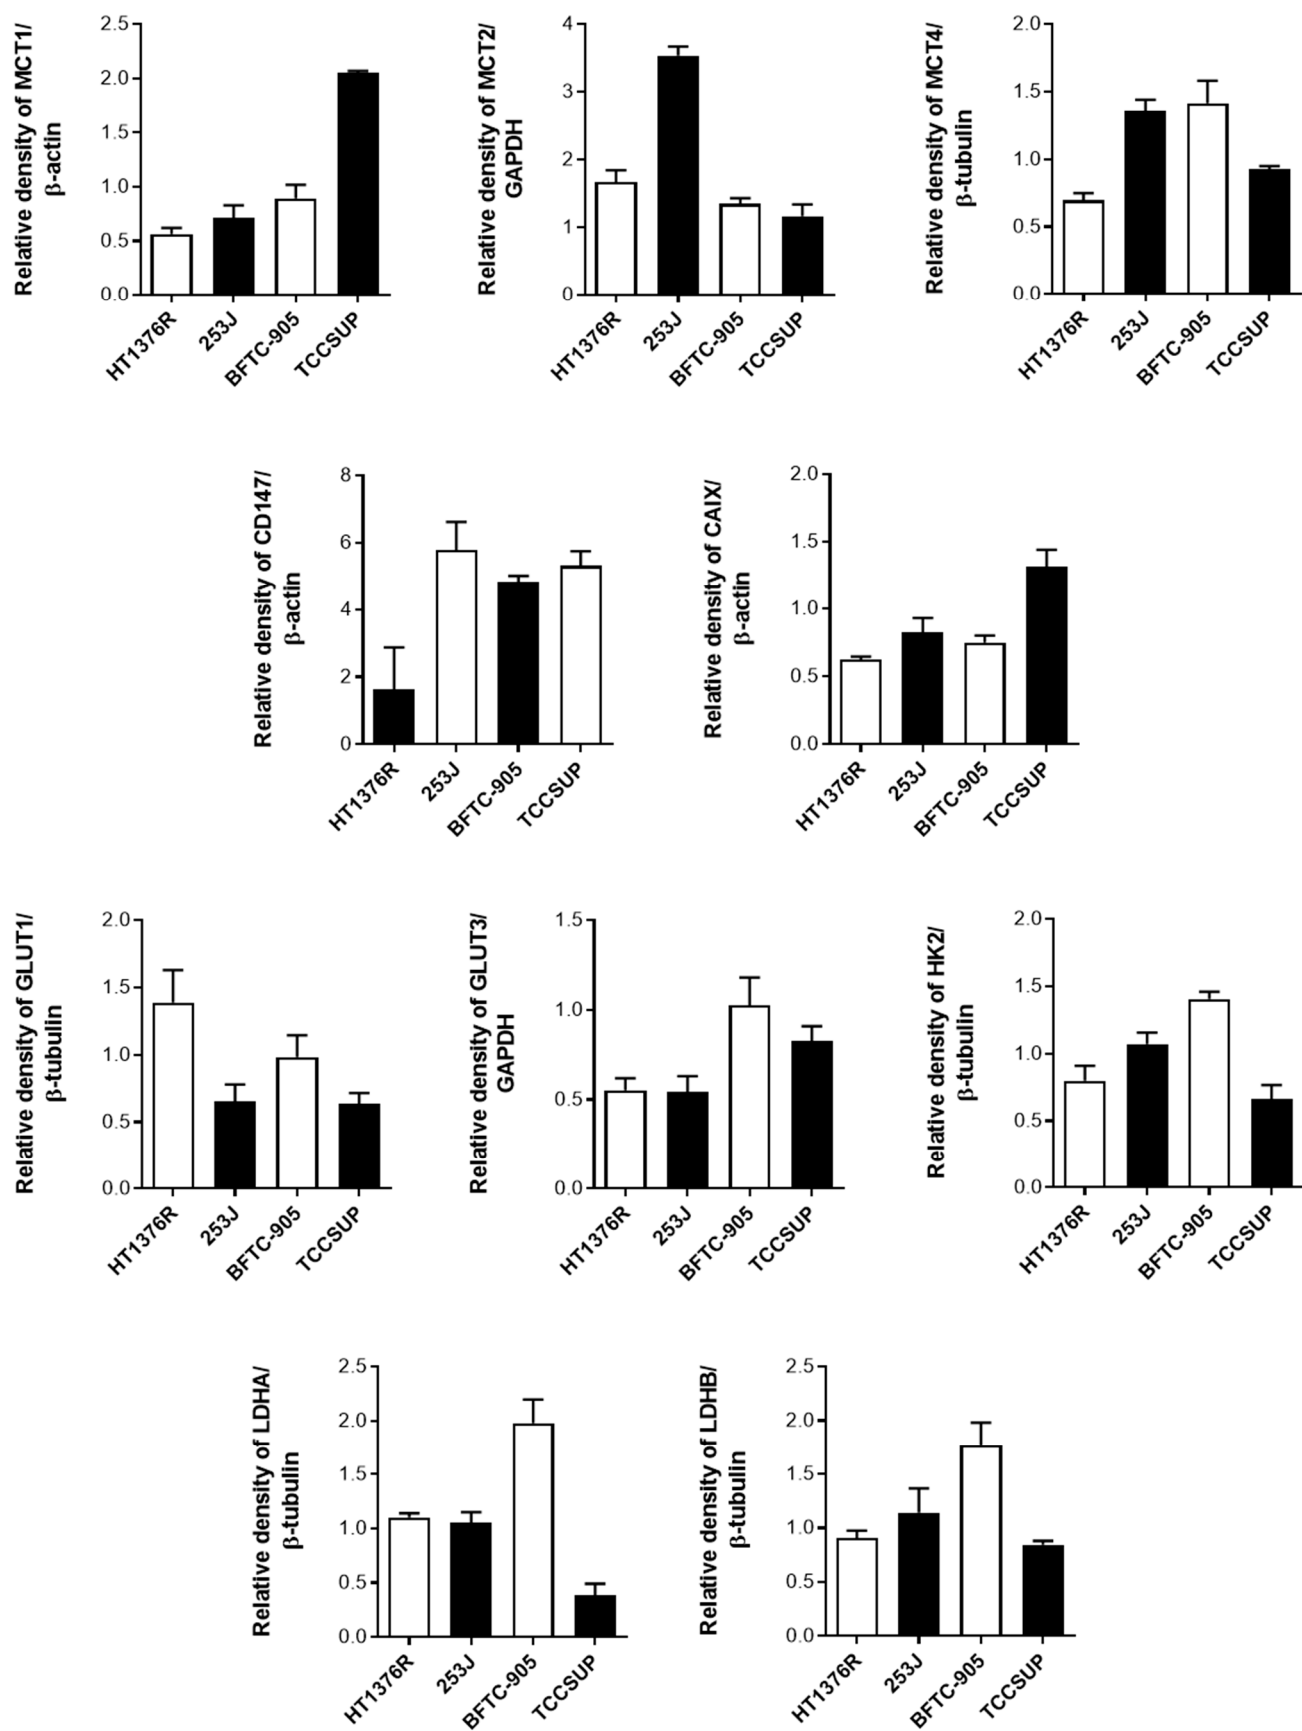

Figure S2. Quantification results of the replicate blots shown in Figure S1.

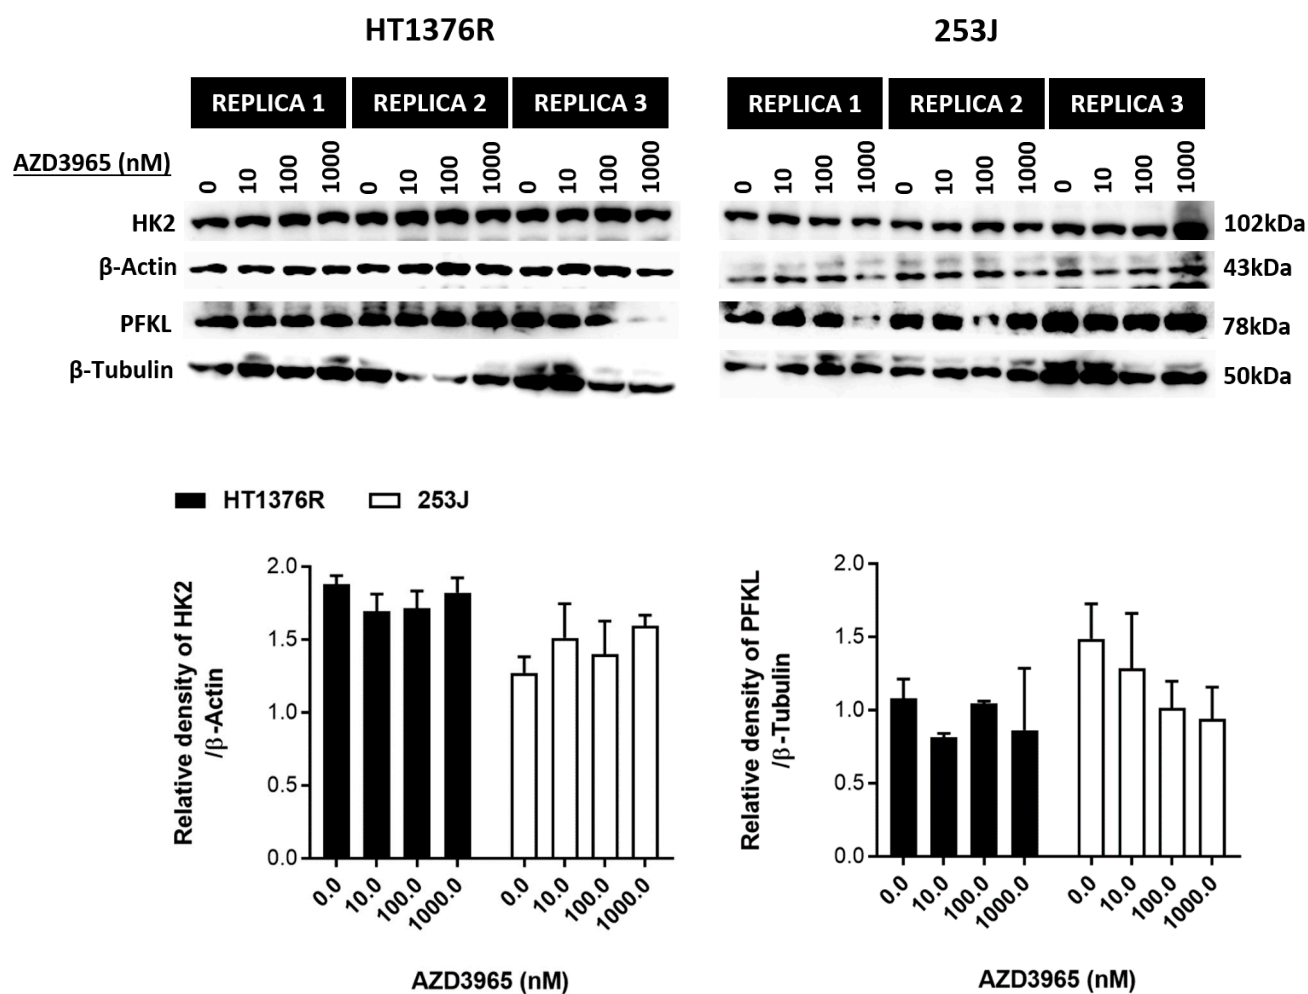

**Figure S3.** Replicate blots (from three independent cell lysates) and quantification results of the Western blot showing levels of HK2 and PFKL in HT1376R and 253J urothelial bladder carcinoma cell lines upon treatment with AZD3965 for 48h;  $\beta$ -Actin and  $\beta$ -Tubulin were used as loading controls.

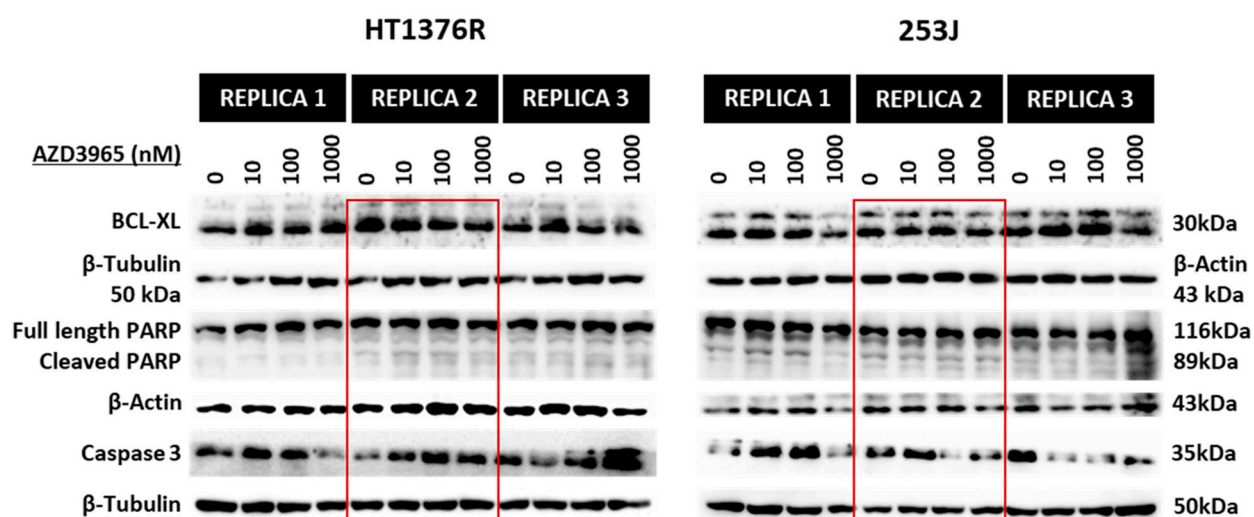

**Figure S4.** Replicate blots for quantification of the Western blot shown in Figure 3B.

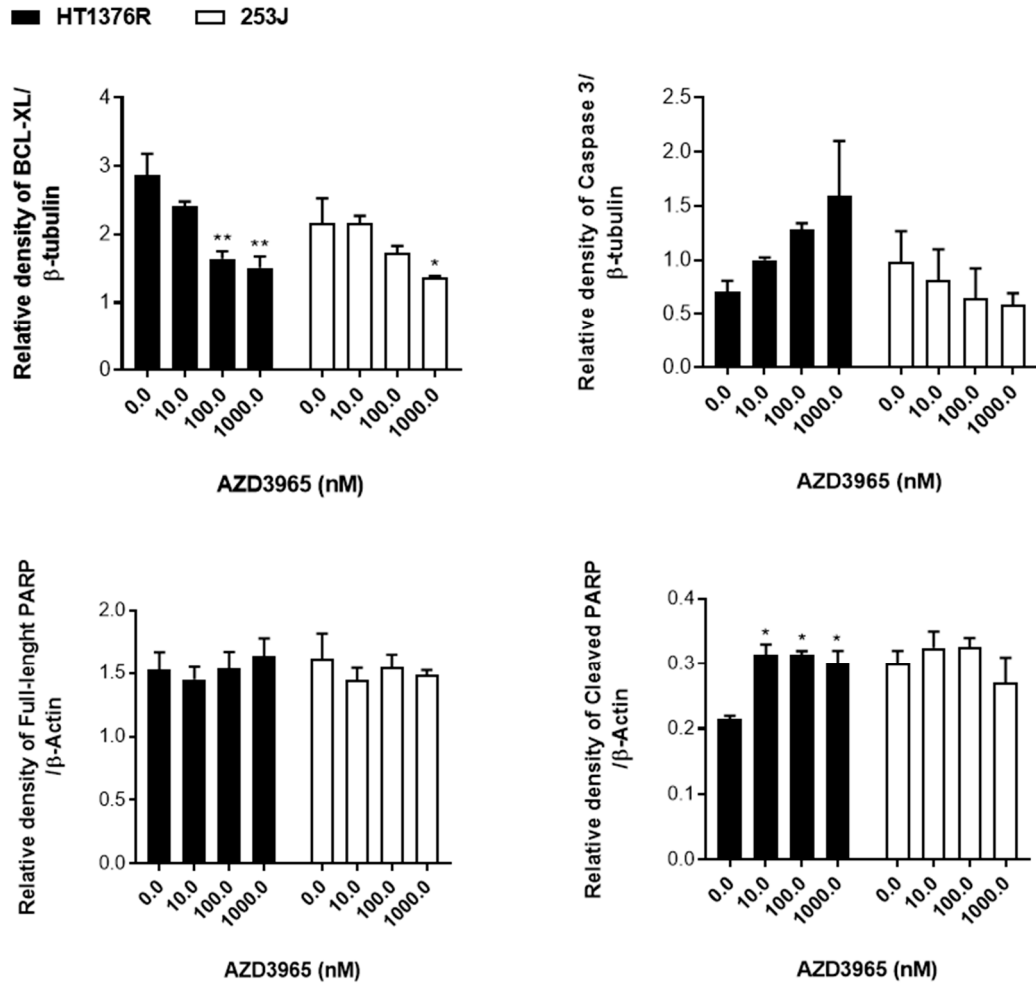

**Figure S5.** Quantification results of the replicate blots shown in Figure S4. \* $p < 0.05$  and \*\* $p < 0.01$  for AZD3965 treatment *versus* control condition.
